# Supplementary material
Source: PubMed Central journal article supplement (PMC3525131)
Supplement: supp_0022034512458691_DS_10.1177_0022034512458691.pdf [file supp_0022034512458691_DS_10.1177_0022034512458691.pdf]

N.N. Maserejian<sup>1\*</sup>, R. Hauser<sup>2,3,4</sup>, M. Tavares<sup>5</sup>,  
F.L. Trachtenberg<sup>1</sup>, P. Shrader<sup>1</sup>, and S. McKinlay<sup>1</sup>

<sup>1</sup>New England Research Institutes, 9 Galen Street, Watertown, MA 02472, USA; <sup>2</sup>Department of Environmental Health, Harvard School of Public Health, Boston, MA, USA; <sup>3</sup>Department of Epidemiology, Harvard School of Public Health, Boston, MA, USA; <sup>4</sup>Vincent Obstetrics and Gynecology, Massachusetts General Hospital and Harvard Medical School, Boston, MA, USA; and <sup>5</sup>The Forsyth Institute, Cambridge, MA, USA; \*corresponding author, nmaserejian@neriscience.com

## Dental Composites and Amalgam and Physical Development in Children

*J Dent Res* DOI: 10.1177/0022034512458691

### APPENDIX

**Appendix Table.** Mean (Standard Deviation) Dental Treatment Received at Baseline and during the 5-year Trial, Overall and by Assigned Treatment Plan

|                                 | By Assigned Treatment |             |             |                              |             |             |                   |             |             |
|---------------------------------|-----------------------|-------------|-------------|------------------------------|-------------|-------------|-------------------|-------------|-------------|
|                                 | Total (N = 474)       |             |             | Compomer/Composite (n = 236) |             |             | Amalgam (n = 238) |             |             |
|                                 | Primary               | Permanent   | Total       | Primary                      | Permanent   | Total       | Primary           | Permanent   | Total       |
| No. surfaces filled at baseline | 6.7 (5.2)             | 2.1 (2.8)   | 8.8 (5.5)   | 6.7 (5.1)                    | 2.3 (2.9)   | 9.0 (5.4)   | 6.7 (5.2)         | 1.9 (2.7)   | 8.6 (5.5)   |
| Compomer/composite              | 3.8 (4.9)             | 1.3 (2.5)   | 5.1 (5.8)   |                              |             |             |                   |             |             |
| Amalgam                         | 2.9 (4.3)             | 0.7 (1.7)   | 3.7 (5.0)   |                              |             |             |                   |             |             |
| Surface-years Exposed*          | 21.4 (20.7)           | 15.2 (18.6) | 36.6 (25.1) | 20.3 (19.8)                  | 16.7 (19.9) | 37.0 (24.6) | 22.5 (21.6)       | 13.8 (17.2) | 36.3 (25.8) |
| Compomer/composite              | 11.3 (17.5)           | 10.0 (17.0) | 21.4 (24.9) |                              |             |             |                   |             |             |
| Amalgam                         | 10.1 (16.9)           | 5.2 (9.9)   | 15.3 (21.1) |                              |             |             |                   |             |             |

\*Reflects the number of filled surfaces and the amount of time (in yrs) that the fillings were present in the mouth during the study period, to indicate cumulative exposure to the restorative treatment.
